# Supplementary material
Source: PubMed Central journal article supplement (PMC8010340)
Supplement: mmc1.pdf [file mmc1.pdf]

## Rapid Design and Implementation of Post-COVID-19 Clinics

*Lekshmi Santhosh, MD, MAEd; Brian Block, MD; Soo Yeon Kim, MD; Sarath Raju, MD, MPH; Rupal J. Shah, MD; Neeta Thakur, MD, MPH; Emily Pfeil Brigham, MD, MHS; and Ann Marie Parker, MD, PhD*

CHEST 2021; 160(2):671-677

*Online supplements are not copyedited prior to posting and the author(s) take full responsibility for the accuracy of all data.*

© 2021 AMERICAN COLLEGE OF CHEST PHYSICIANS. Reproduction of this article is prohibited without written permission from the American College of Chest Physicians. See online for more details. DOI: 10.1016/j.chest.2021.03.044

## **e-Appendix 1: Sample Electronic Health Record Template for a Post-COVID Clinic<sup>i</sup>**

### **OPTIMAL CLINIC NOTE**

#### **Chief Complaint: Follow-up for pulmonary symptoms after COVID-19**

#### **History of present illness:**

@AGE@ @SEX@ presenting for evaluation in the OPTIMAL clinic, referred by \*\*\*.

#### Presenting Symptoms:

Initial presenting symptoms for COVID-19 included \*\*\*, which began on \*\*\*. They were tested for COVID-19 on \*\*\*. They {DID/DID NOT:23705} have known COVID positive contacts.

#### COVID-19 Course:

Their maximum oxygen requirement was \*\*\*. [Drop-down menu for NC, HFNC, Intubation]

Therapies for COVID included: \*\*\*. They {WERE / WERE NOT:19253} enrolled in a randomized clinical trial.

COVID-19 was thought to have the following end-organ manifestations. \*\*\*

The date of discharge was \*\*\*. At discharge they were experiencing the following COVID related symptoms \*\*\*. The oxygen requirement at discharge was \*\*\* They were prescribed \*\*\* respiratory medications related to COVID-19.

#### Current Pulmonary Symptoms:

Today they are experiencing the following COVID related symptoms \*\*\* They {have/have not:27031} required readmission for COVID-19 related issues.

\*\*\*

At this time they {ARE/ARE NOT:23033} self-isolating. Since initial diagnosis {have/have not:27031} had negative COVID-testing. They {Actions; do/do not:19616} report sick family members / household contacts.

Dyspnea (mMRC): {mMRC dyspnea scale:39338}

Breathlessness cough and sputum Scale (BCSS):

Difficulty breathing today? {pactbreathless:39344}

Cough today? {pactcough:39345}

Sputum today? {pactsputum:39346}

#### Current Mental Health Symptoms:

Depression Symptoms: \*\*\*

PHQ-9 Total Score: \*\*\*

Anxiety Symptoms: \*\*\*

GAD7 Score: \*\*\*

PTSD Symptoms: \*\*\*

Physical Function:  
\*\*\*

AMPAC Score: \*\*\*

Cognitive Symptoms:  
\*\*\*

Mini-Cog Score \*\*\*

Social History:

Smoking History:  
Traditional Cigarettes: \*\*\*  
E-Cigarettes / Vaping: \*\*\*

Exposures (home/work/travel):

Employment Status Prior to Hospitalization: \*\*\*

Current Employment Status: \*\*\*

Occupation (if employed):

Immunizations:  
**.IMM DOTPHRASE**

**Review of systems:**  
ROS otherwise as per HPI and other 12 point ROS is negative.

**@PMH@**

**@FAMHX@**

**@SOC@**

**@ALLERGY@**

**@MEDSCURRENT@**

**Exam:**  
Previous weights: @LASTWTNOHEADER(3)@  
Link to Physical Exam SmartBlock

**Nadir Ambulatory O2 Saturation if Available: \*\*\***

**Data:**

**I have personally reviewed and interpreted the following:**

**PFTs that I have personally reviewed and interpreted showing \*\*\***

PFTs:

Date \*\*\*:

| Parameter | Absolute Value | % Predicted |
|-----------|----------------|-------------|
| FEV1      | *** L          | ***%        |
| FVC       | *** L          | ***%        |
| FEV1/FVC  | ***            |             |
| TLC       | *** L          | ***%        |
| DLCO      | ***            | ***%        |

**Imaging that I have personally reviewed and interpreted showing \*\*\***

Imaging: \*\*\*

**Echo that I have personally reviewed and interpreted showing \*\*\***

Echo: \*\*\*

**EKG that I have personally reviewed and interpreted showing QTc \*\*\***

**Labs that I have personally reviewed and interpreted showing \*\*\* [e.g. COVID-19 tests, Flu A/B/RSVP, CRP, BNP, PCT, etc.]**

Labs:

[Delete COVID-19 tests, flu A/B/RSV, CRP, BNP, IL-6, PROCAL \*\*\*]

Most Recent Laboratory Data:

@RESUFAST(WBC,RBC,HGB,HCT,MCV,MCHC,MCH,RDW,PLT,NRBC,NRBCX)@

@RESUFAST(NA,K,CL,GLU,BUN,CREATININE,CO2,CALCIUM,PROT,ALBUMIN,BILITOT,ALKPHOS,AST,ALT:1)@

@RESUFAST(CKTOTAL,CKMB,CKMBINDEX,TROPONINI,TROPONINT)@

@RESUFAST(DDIMER)@

**Assessment and Plan:**

@AGE@ @SEX@ presenting after recent admission with COVID-19. \*\*\*

**#\*\*\***

-

**#\*\*\***

-

**#Post-COVID Pulmonary Health**

-

**# Post-COVID Mental Health**

-

**# Post-COVID Physical Function**

-

**# Post-COVID Cognitive Function**

**Disposition from COVID Clinic:**

@FOLLOWUP@

**Orders placed at this visit:**

@ORDERSENC@

@Provider Signature Block/Name/Date@

**e-APPENDIX 2: Sample Clinic Referral Pathway**

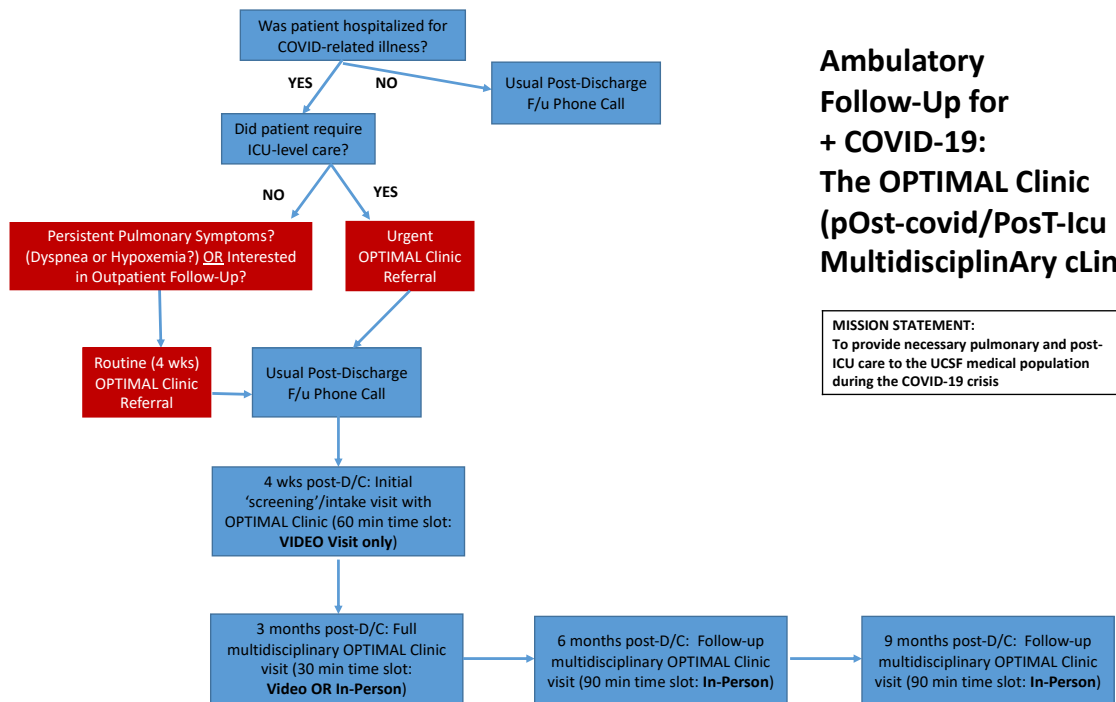

**Ambulatory Follow-Up for + COVID-19: The OPTIMAL Clinic (pOst-covid/PosT-Icu MultidisciplinAry cLinic)**
